# Supplementary material for: Evidence of ubiquitous Alfvén pulses transporting energy from the photosphere to the upper chromosphere
Source: PubMed Central journal article supplement (PMC6683129; doi:10.1038/s41467-019-11495-0), 2019-08-05
Supplement: 41467_2019_11495_MOESM1_ESM.pdf [file 41467_2019_11495_MOESM1_ESM.pdf]

# Supplementary Information: Evidence of Ubiquitous Alfvén Pulses Transporting Energy from the Photosphere to the Upper Chromosphere

Jiajia Liu<sup>1,\*</sup>, Chris J Nelson<sup>2,1</sup>, Ben Snow<sup>1</sup>, Yuming Wang<sup>3,4</sup>, Robert Erdélyi<sup>1,5</sup>

<sup>1</sup>*Solar Physics and Space Plasma Research Centre (SP2RC), School of Mathematics and Statistics, The University of Sheffield, Sheffield, S3 7RH, UK*

<sup>2</sup>*Astrophysics Research Centre (ARC), School of Mathematics and Physics, Queen's University, Belfast, BT7 1NN, Northern Ireland, UK*

<sup>3</sup>*CAS Key Laboratory of Geospace Environment, Department of Geophysics and Planetary Sciences, University of Science and Technology of China, Hefei, Anhui 230026, China*

<sup>4</sup>*CAS Center for Excellence in Comparative Planetology, Hefei, Anhui 230026, China*

<sup>5</sup>*Department of Astronomy, Eötvös Loránd University, Budapest, Pázmány P. sétány 1/A, H-1117, Hungary*

\* *Corresponding Author, email: jj.liu@sheffield.ac.uk*

## Supplementary Note 1: SST Data

The ground-based data analysed here were targeted at a quiet region close to the disk centre, sampled by the SST/CRISP instrument between 08:07:22 UT and 09:05:44 UT on the 21st June 2012. The SST/CRISP sequence that ran during this time consisted of a single-point full-Stokes measurement at the core of the Fe I 6302.5 Å line, an eleven-point H $\alpha$  line scan sampling evenly between  $\pm 1.3$  Å from the line core, and a nineteen-point Ca II 8542 Å line scan sampling evenly between  $\pm 0.5$  Å from the line core. The FOV was approximately  $55'' \times 55''$ , with an initial central co-ordinates of  $x_c = -3''$ ,  $y_c = 70''$ . The data were reduced employing the Multi-Object Multi-Frame Blind Deconvolution (MOMFBD)<sup>1</sup> method. The standard CRISPRED pipeline<sup>2</sup>, including additional steps to account for differential stretching<sup>3</sup>, was also used. After applying the above reductions, the data has then a cadence of approximately 8.25 s and a pixel size of  $0.059''$  ( $\sim 43.6$  km, resulting in a FOV of  $\sim 40.6$  Mm  $\times$   $40.6$  Mm).

## Supplementary Note 2: Governing Equations of the Numerical Simulation and the Construction of the Single Magnetic Flux Tube

The numerical simulation used in this work has been performed employing SAC<sup>4</sup>, which solves the full ideal, compressible MHD equations for a perturbation within a gravitationally stratified background atmosphere. The governing equations are given by:

$$\begin{aligned}
& \frac{\partial \rho}{\partial t} + \nabla \cdot [\mathbf{v}(\rho_b + \rho)] = 0 + D_\rho(\rho), \\
& \frac{\partial [(\rho_b + \rho)\mathbf{v}]}{\partial t} + \nabla \cdot [\mathbf{v}(\rho_b + \rho)\mathbf{v} - \mathbf{B}\mathbf{B}] - \nabla [\mathbf{B}\mathbf{B}_b + \mathbf{B}_b\mathbf{B}] + \nabla p_t \\
& \quad = \rho \mathbf{g} + \mathbf{D}_{\rho v} [(\rho_b + \rho)\mathbf{v}], \\
& \frac{\partial e}{\partial t} + \nabla \cdot [\mathbf{v}(e + e_b) - \mathbf{B}\mathbf{B} \cdot \mathbf{v} + \mathbf{v}p_t] - \nabla [(\mathbf{B}\mathbf{B}_b + \mathbf{B}_b\mathbf{B}) \cdot \mathbf{v}] + p_{tb}\nabla \mathbf{v} - \mathbf{B}_b\mathbf{B}_b\nabla \mathbf{v} \\
& \quad = \rho \mathbf{g} \cdot \mathbf{v} + D_e(e), \\
& \frac{\partial \mathbf{B}}{\partial t} + \nabla \cdot [\mathbf{v}(\mathbf{B} + \mathbf{B}_b) - (\mathbf{B} + \mathbf{B}_b)\mathbf{v}] = 0 + \mathbf{D}_B(\mathbf{B}), \\
& p_t = p_k + \mathbf{B}^2/2 + \mathbf{B}_b\mathbf{B}, \\
& p_k = (\gamma - 1) [e - (\rho_b + \rho)\mathbf{v}/2 - \mathbf{B}_b\mathbf{B} - \mathbf{B}^2/2], \\
& p_{tb} = p_{kb} + \mathbf{B}_b^2/2, \\
& p_{kb} = (\gamma - 1) (e_b - \mathbf{B}_b^2/2).
\end{aligned} \tag{1}$$

32 Here,  $\rho$ ,  $\mathbf{v}$ ,  $e$ ,  $\mathbf{B}$ ,  $p_k$  and  $p_t$  are the perturbed density, perturbed velocity vector, perturbed energy  
33 density per unit volume, perturbed magnetic field vector, perturbed kinetic pressure and perturbed  
34 total pressure, respectively.  $\gamma$  is the gas adiabatic index, set to be 5/3 in the simulation.  $\mathbf{g}$  is  
35 the gravitational field vector, set to be  $-274 \text{ m s}^{-2}$  along the  $z$ -direction. Subscript  $b$  denotes  
36 background parameters. Sub-grid numerical diffusion and resistivity are applied to the equations  
37 as the terms  $D$ . Details of these hyperdiffusive and hyperresistive terms could be found in Equation  
38 (22) to Equation (32) in the original SAC paper<sup>4</sup>.

39 The self-similar expanding open magnetic flux tube embedded into the background atmo-  
40 sphere, similar to flux tubes constructed and studied in previous work<sup>5,6</sup>, has been constructed  
41 analytically from the following equations:

$$\begin{aligned}
B_x &= -x B_{0z}(z) \frac{d\alpha}{dz} \cdot G(f), \\
B_y &= -y B_{0z}(z) \frac{d\alpha}{dz} \cdot G(f), \\
B_z &= \alpha B_{0z}(z) \cdot G(f) + B_{bz}, \\
f &= \alpha \frac{r}{r_0}, \\
G(f) &= e^{-\frac{1}{2}f^2}.
\end{aligned} \tag{2}$$

42 Here,  $B_x$ ,  $B_y$  and  $B_z$  are the  $x$ -,  $y$ - and  $z$ -component of the magnetic field of the flux tube.  
43  $B_{bz} = 17.5$  G is the  $z$ -component of the background magnetic field outside the flux tube.  $r$  is  
44 the distance to the centre of the flux tube.  $r_0$  is the radial scaling and set as 39.38 km. The term  
45  $G(f)$  is set to be a Gaussian function of  $f$  in order to ensure the shape of the magnetic flux tube is  
46 consistent while it expands to balance the external pressure with the increasing height.  $B_{0z}(z)$  is a  
47 function of  $z$ :

$$\begin{aligned}
B_{0z}(z) &= \alpha B_{0z}(0), \\
\alpha &= e^{-\frac{z}{z_3}}
\end{aligned} \tag{3}$$

48 where,  $B_{0z}(0)$  is the magnetic field strength of the flux tube at its bottom (800 G), and  $z_3$  is the  
49 chromospheric scale height (0.45 Mm). The corresponding pressure and density deviations from  
50 the non-magnetic equilibrium of the background atmosphere are then calculated based on the total  
51 pressure balance<sup>6,7</sup>. More details could be found in Appendix B of the reference<sup>6</sup>.

## 52 **Supplementary Discussion 1: Density Variations Resulted from Alfvén Pulses**

53 It is worth highlighting that the number of detected SOT/SST photospheric intensity swirls are  
54 around half of the number of SOT/SST chromospheric swirls. There could be multiple causes for  
55 this, including but not limited to: 1) photospheric intensity is an integration over different heights  
56 in the photosphere, meaning more noise; 2) rotating speed of photospheric intensity swirls is rather  
57 small (half of that of chromospheric swirls), as we can see from the results, meaning that many  
58 of them would not be resolved by the combination of the FLCT (which already usually underes-  
59 timate the photospheric velocity by a factor of as much as three<sup>8</sup>) and swirl detection algorithm  
60 (which highly relies on the rotational speed); 3) there is different density inhomogeneity in the  
61 photosphere and chromosphere, meaning some swirls would not be detected if the local plasma is

62 not inhomogeneous enough. Exact reasons need to be confirmed using simulation data, however,  
 63 this is beyond the present scope of this article.

64 We have found, that, ubiquitous photospheric swirls could excite Alfvén pulses which prop-  
 65 agate upward into the upper chromosphere and result in the ubiquitously observed chromospheric  
 66 swirls. Some readers might think the above scenario hard to understand because pure Alfvén waves  
 67 are incompressible (meaning that they cannot result in local density concentration or rarefaction).  
 68 However, even though Alfvén pulses cannot cause density perturbations, we demonstrate that they  
 69 can still result in the observed density variation under the frozen-in condition when density inho-  
 70 mogeneity is present, employing the following toy model.

71 In this model, a uniform flux tube along the  $z$ -direction is constructed with the initial vertical  
 72 and azimuthal magnetic field  $B_z = 100$  and  $B_a = 0$ , respectively. An Alfvén pulse is introduced at  
 73 the bottom of the flux tube at  $t = 0$  and propagates upward with a constant speed ( $v$ ). This Alfvén  
 74 pulse introduces an azimuthal magnetic field perturbation defined as:

$$\begin{aligned}
 B_a(z, r, t) &= A \cdot \frac{r}{r_0} \cdot B \cdot \cos\left(\frac{z - z_0(t)}{d_0} \pi\right), \\
 z_0(t) &= v \cdot t + 0.5d_0, \\
 z_0(t) - 0.5d_0 &\leq z \leq z_0(t) + 0.5d_0.
 \end{aligned}
 \tag{4}$$

75 Here,  $z$  and  $t$  are the vertical position along the flux tube and time, respectively.  $0 < A < 1$  is the  
 76 amplitude ratio.  $r$  and  $r_0 = 300$  are the distance to the axis of the flux tube and the radius of the flux  
 77 tube, respectively.  $B$  is the total magnetic field strength (100).  $d_0 = 200$  is the vertical extension  
 78 of the magnetic field perturbation. The plasma density ( $\rho$ ) inside the flux tube is inhomogeneous,  
 79 and is defined by:

$$\rho(\vartheta) = 40(1 + \cos(2\vartheta)).
 \tag{5}$$

80 Here, again,  $r$  is the distance to the axis of the flux tube.  $\vartheta$  is the azimuthal angle. All the above  
 81 values are set for the best appearance of the visualization.

82 A visualization of the constructed flux tube is shown in Movie M3. Due to the frozen-in  
 83 condition, the density elements rotate accordingly in the opposite direction from the twist when  
 84 the Alfvén pulse passes by and therefore could be observed as a swirl in real observations. This  
 85 density variation is caused by the condition that infinitesimal plasma elements are sitting fixed on  
 86 given field lines under the frozen-in condition. The variation should not be mixed up by material  
 87 in/out-flows that may happen, would the passing pulse not be Alfvén.

88 We shall notice that the above scenario is based on two basic conditions: plasma is frozen-in  
 89 and there is a local density inhomogeneity. The first condition is fulfilled in the upper chromo-  
 90 sphere, while the second is not always fulfilled for a given instrumental resolution. We demonstrate  
 91 that, if a swirl is observed in the photosphere while the corresponding plasma density in the upper  
 92 chromosphere is not significantly inhomogeneous, the Alfvén pulse could still be excited but no  
 93 chromospheric swirl will be observed. This adds another effect into what we suggested in the main  
 94 article, that, the number of photospheric swirls which were found to have their correspondences in  
 95 the chromosphere should have been under-estimated.

## 96 **Supplementary Discussion 2: Energy Flux of Alfvén pulses**

97  
 98 Under the small-amplitude, short-wavelength assumption, the energy flux carried into the upper  
 99 chromosphere by a single Alfvén pulse could be expressed as:

$$F_A = \rho \hat{v}^2 c_A, \quad (6)$$

100 where,  $\rho \approx 4 \times 10^{-8} \text{ kg m}^{-3}$  is the mass density at the bottom of the upper chromosphere in the  
 101 simulation ( $z = 1000 \text{ km}$ ),  $\hat{v} \approx 2 - 4 \text{ km s}^{-1}$  is the observed average rotating speed of swirls, and  
 102  $c_A \approx 12 \text{ km s}^{-1}$  is the Alfvén speed at  $z = 1000 \text{ km}$ . These measurements result in an energy flux  
 103 from  $1.9$  to  $7.7 \text{ kW m}^{-2}$  - large enough to balance local upper chromospheric energy loss ( $\sim 10^2$   
 104  $\text{W m}^{-2}$ ) in quiet regions<sup>9</sup>. To evaluate their contribution to the global heating, we calculate the  
 105 average energy flux ( $\overline{F_A}$ ):

$$\overline{F_A} = \frac{F_A \overline{N} \pi \overline{R}^2}{S_{FOV}}, \quad (7)$$

106 where,  $F_A = 1.9 - 7.7 \text{ kW m}^{-2}$  is the energy flux carried by a single Alfvén pulse estimated above.  
 107  $\overline{N} = 48.2$  and  $\overline{R} = 0.3 \text{ Mm}$  are the average number of swirls in each frame and swirl effective  
 108 radius in the SOT chromospheric observations.  $S_{FOV} = 800 \text{ Mm}^2$  is the area of the FOV of the  
 109 SOT observations.  $\overline{F_A}$  is, then, found to be around  $33 - 131 \text{ W m}^{-2}$ , comparable to the energy flux  
 110 needed to compensate the observed excess in radiation. Moreover, there are several facts that we  
 111 should also bear in mind:

112 First, we have found, via applying ASDA to a series of realistic MHD simulations, that, by  
 113 slightly decreasing the pixel size from  $39.2 \text{ km}$  to  $31.2 \text{ km}$ , ASDA found  $70\%$  more photospheric  
 114 swirls<sup>10</sup>. This means that the average number of swirls detected in each frame is largely under-  
 115 estimated with the current resolution. The estimated total number of chromospheric swirls and

116 average energy flux could be extrapolated to  $6.3 \times 10^5$  and 56 - 222  $\text{W m}^{-2}$ , respectively, if the  
117 pixel resolution increases to 31.2 km.

118 Second, we have set a very strict criteria: any swirl candidate with expanding/shrinking speed  
119 larger than half of its rotating speed was not considered as a swirl. Many candidates which might  
120 be potential swirls have been removed due to the above criteria. For example, if we slightly loosen  
121 the criteria to keep candidates with expanding/shrinking speed less than their rotating speeds, the  
122 total number of swirls would be 4 times larger, as well as the average associated energy flux (132  
123 - 524  $\text{W m}^{-2}$ ).

124 Third, We have demonstrated that, even though ASDA could keep high accuracy in deter-  
125 mining swirl properties, many swirls would be missed when noise is present<sup>10</sup>.

126 And Fourth, as per the previous discussions, the successful observation of chromospheric  
127 swirls rely on local density inhomogeneity. Some Alfvén pulses could have been missed in the  
128 observations due to insignificant density inhomogeneity.

129 Having considered the above effects, we demonstrate that the average energy flux contributed  
130 by Alfvén pulses estimated above ( $33 - 131 \text{ W m}^{-2}$ ) should be the lower limit. We shall also  
131 note that, possible reflection and dissipation may also affect the local energy budget. However,  
132 we do not see any evidence of reflection or dissipation of these Alfvén pulses in the data. This  
133 may be an interesting future direction to investigate, but is beyond the scope of the current study.  
134 Moreover, the estimation of the energy flux of the observed Alfvén pulses is based on either em-  
135 pirical/theoretical (mass density and Alfvén speed) or observational (the average rotating speed  
136 of swirls) results at the bottom of the upper chromosphere, thus possible reflection and dissipa-  
137 tion during their propagation from the photosphere to the bottom of the upper chromosphere are  
138 irrelevant in the above energy flux estimation.

139 To conclude, Alfvén pulses introduced by the observed atmospheric intensity swirls are able  
140 to carry considerable energy into the upper chromosphere. The associated energy flux is more than  
141 enough to balance the local upper chromospheric energy losses in quiet Sun regions, while their  
142 global contribution needs to be further studied using observations with higher spatial and temporal  
143 resolutions.

### 144 **Supplementary Discussion 3: Possible Relationship with Small-scale Magnetic Flux Tubes**

145 In the numerical simulation, we have studied the propagation of an Alfvén pulse in an expanding  
146 magnetic flux tube. Thus, if we could find some (significant) correlation between photospheric  
147 swirls and small-scale vertical magnetic flux tubes, we will have more evidence about the excitation  
148 of the Alfvén pulses. However, what are the observational signatures of magnetic flux tubes? We

149 could be almost sure that, magnetic bright points<sup>11</sup> (MBPs) represent small-scale magnetic flux  
150 tubes with strong (up to kG) magnetic field. But, are there small-scale magnetic flux tubes if there  
151 is no MBP? We are afraid that the answer is yes.

152 Even if ignoring the above dilemma, we have found it is impossible to study the correlation  
153 between the detected swirls and MBPs using the currently available data because:

154 First, SST observations could provide observations of MBPs with barely enough resolution.  
155 However, unfortunately, we do not have enough Stokes observations to derive magnetic field in-  
156 formation in our current available dataset, even if we ignore the influence of the seeing effect on  
157 the observation of MBPs.

158 And second, magnetic field data observed by the Helioseismic and Magnetic Imager<sup>12</sup> (HMI)  
159 onboard the Solar Dynamics Observatory (SDO) might be a candidate, however, its resolution  
160 (with a pixel size of more than 440 km,  $\sim 10$  times of that of the utilized SST observations) seems  
161 too large. Given that the typical radius of a photospheric MBP is around 100 km<sup>13</sup>, its magnetic  
162 field would be averaged to as low as 30 to 60 G in HMI observations, if its original magnetic  
163 field strength is a typical value of 500 to 1000 G. It means, if we see a bright pixel with magnetic  
164 field just above 3 times of the observational error (10 G)<sup>14</sup>, we may have no idea whether it is an  
165 averaged MBP, or a weak region with no MBP, or just simply within the  $3\sigma$  error.

166 Ignoring the above effects for a moment, we have done a series of tests using HMI line-  
167 of-sight (LOS) magnetograms. Supplementary Figure 7 shows an example of the absolute LOS  
168 magnetic field with a scale from 0 (white) to 50 G (black), in the FOV of the corresponding SST  
169 observations. HMI data has been aligned to match the location and orientation of SST observations,  
170 using information derived from feature comparison between SST Fe I 6302 Å wideband and AIA  
171 1700 Å observations. We can see how coarse the HMI observation is and how small-scale magnetic  
172 elements are smoothed over pixels.

173 Red and blue contours are the detected SST photospheric intensity swirls. Now, we use an  
174 extremely loose criterion: any swirl with even one point having absolute magnetic field strength  
175 above 30 G is considered to have a strong magnetic field (and thus marked as corresponding to  
176 a magnetic flux tube), and is contoured out with solid lines. All others are contoured out with  
177 dashed lines. As we can see, there is only 1 swirl corresponding to strong magnetic field in the  
178 HMI image.

179 We have further studied all 77 frames of the HMI observations during the period of the  
180 utilized SST observations in this work, by exploring their correlation with photospheric intensity  
181 swirls detected in their closest (in time) SST frames. It turns out that, only 3.3% of the swirls have  
182 been found to correspond to strong HMI magnetic field regions. As a comparison, we further did a  
183 Monte-Carlo test by comparing each HMI observation with a random (in time) SST swirl detection

184 result. Unsurprisingly, again, 3.3% swirls have been found to correspond to strong HMI magnetic  
185 field regions. All the above results indicate that, HMI observations are too coarse to be used.

186 To conclude, we are not able to see any reliable solution for this particular problem using  
187 solar observations at the current stage. As far as we are aware, there are possibly two ways to  
188 study this particular problem: 1) applying swirl detection and MBP detection algorithms to realistic  
189 simulation data (for example Bifrost). This will be one of our future avenues of work, however,  
190 it would require access to Bifrost simulation data and the development of (or use of if there is  
191 openly available) an automated MBP detection algorithm; 2) using the high-resolution magnetic  
192 field observations from the Daniel K. Inouye Solar Telescope (DKIST) would be another good  
193 choice.



194 **Supplementary Figures**

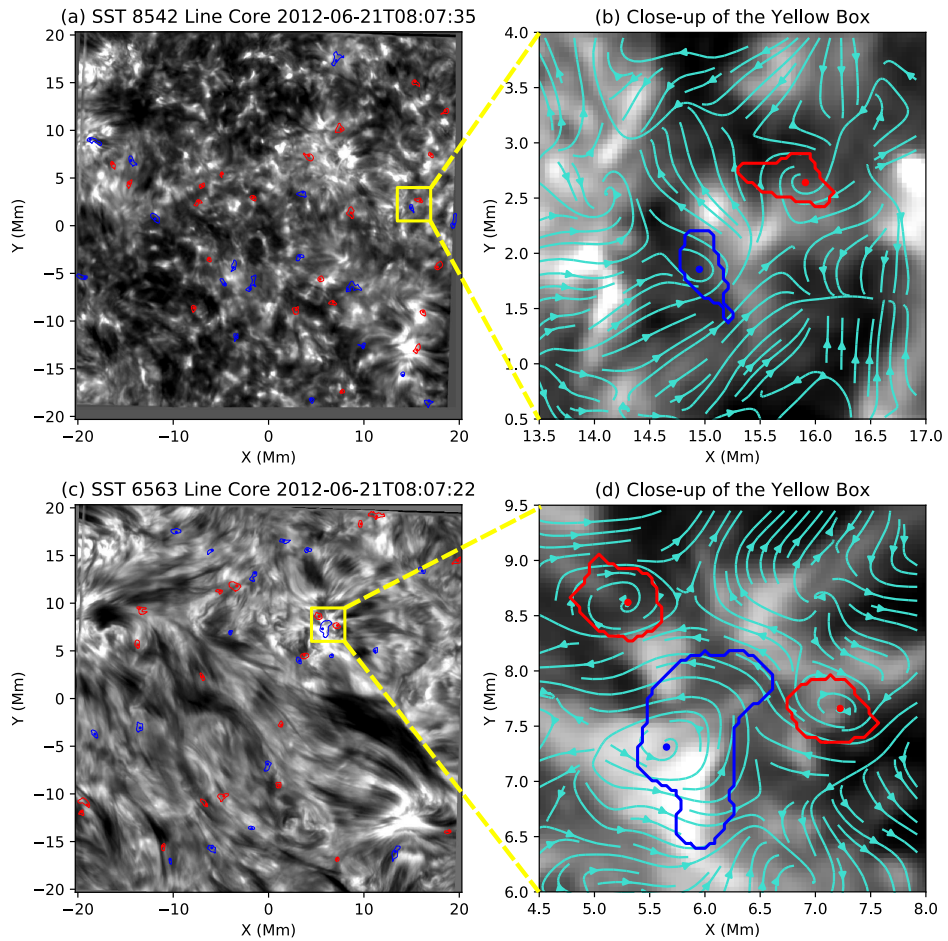

Supplementary Figure 1: **Chromospheric swirls detected from the SST observations.** Panel (a) and (b) are observations at the Ca II 8542 Å line core, and panel (c) and (d) are observations at the H $\alpha$  6563 Å line core. The intensity observations are shown as the white-black background in all panels. Swirls, with positive (negative) rotating direction are denoted in blue (red). Contours and dots are their edges and centres, respectively. Turquoise arrows in panel (b) and (d) represent tracked velocity field by the FLCT method. Source data are provided in the Source Data file.

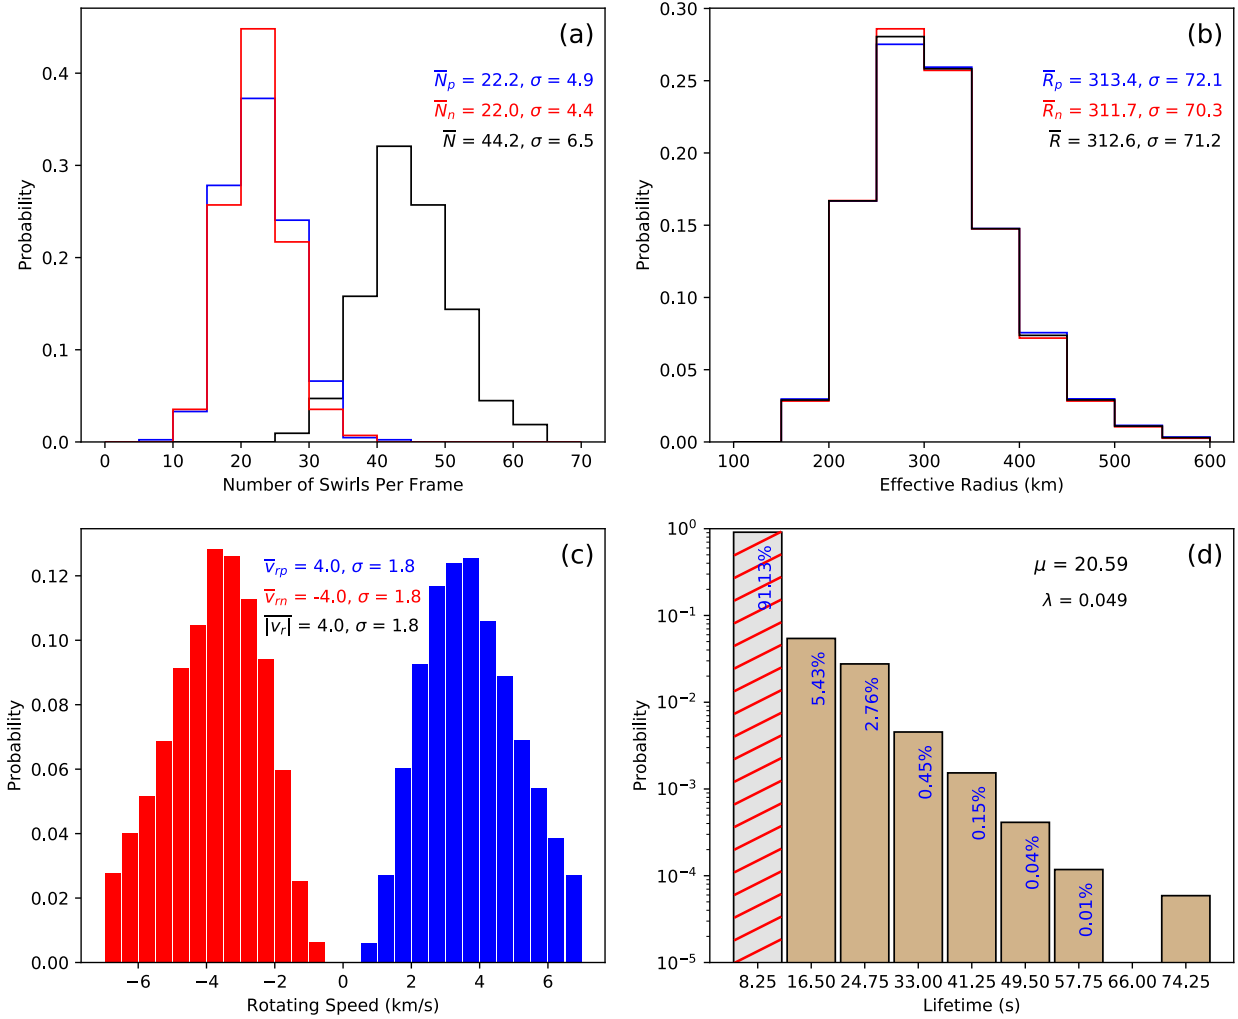

Supplementary Figure 2: **Statistics of swirals detected from the SST Ca II line core observations.** Panel (a) denotes the distribution of number of swirals per frame, with (b) the effective radii, (c) the average rotating speeds at edges, and (d) the lifetimes of all swirals. Blue (red) curves, bars and texts in the first three panels represent results of positive (negative) swirals. Black curves and texts are the results of all swirals.  $\mu$  and  $\lambda$  in panel (d) are the expectation and maximum likelihood estimation of the exponential rate parameter of the lifetime, respectively. The left most bar is striped, because lifetimes less than twice of the cadence are not measured but estimated given the limitation on the cadence. It has also been excluded when estimating  $\mu$  and  $\lambda$ . Source data are provided in the Source Data file.

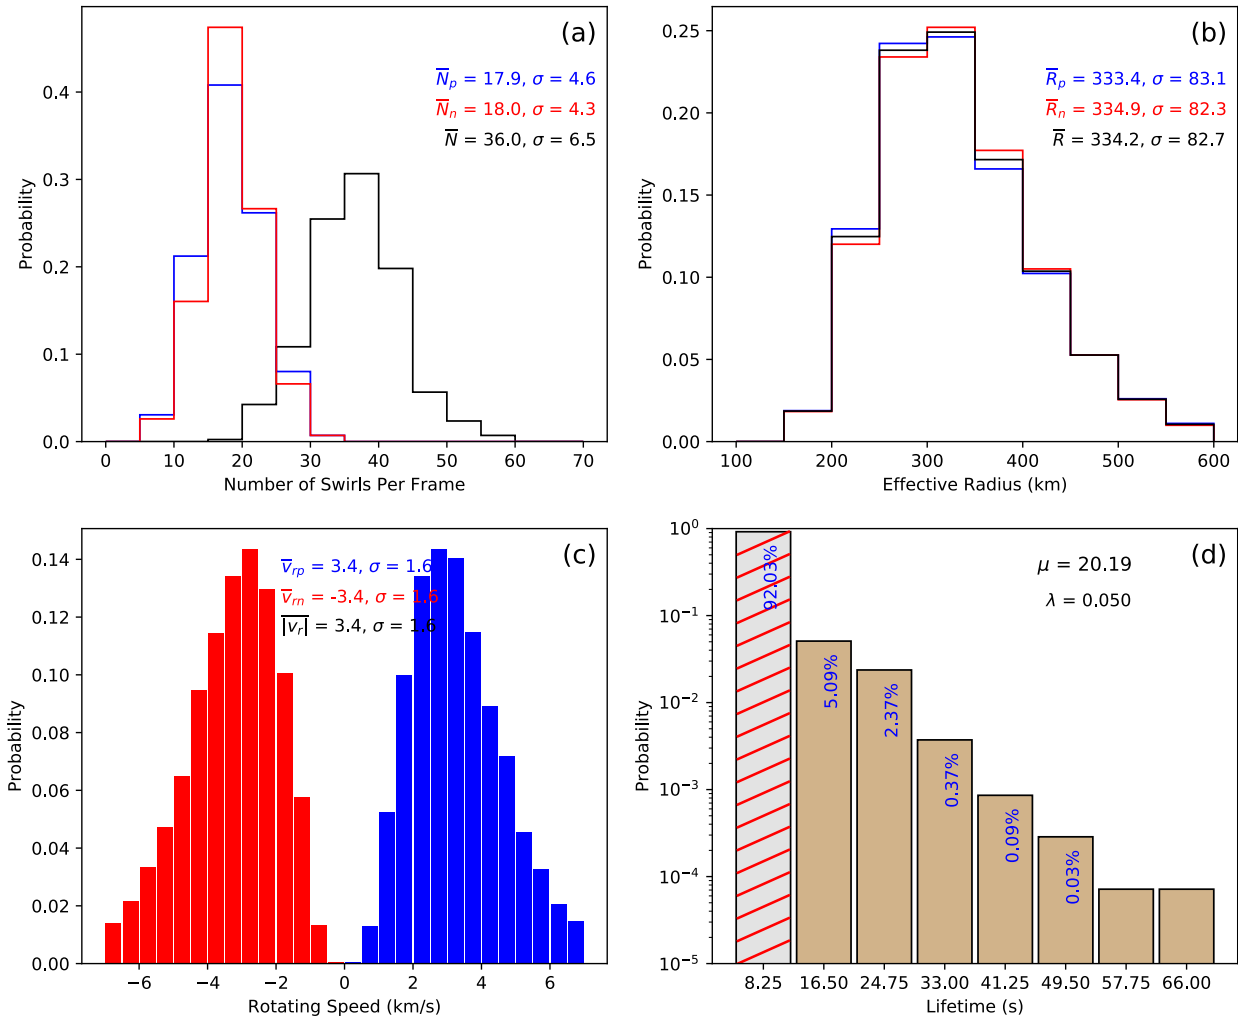

Supplementary Figure 3: **Statistics of swirls detected from the SST H $\alpha$  line core observations.** See the legend of Supplementary Figure 2 for explanations of symbols, bars and colors. Source data are provided in the Source Data file.

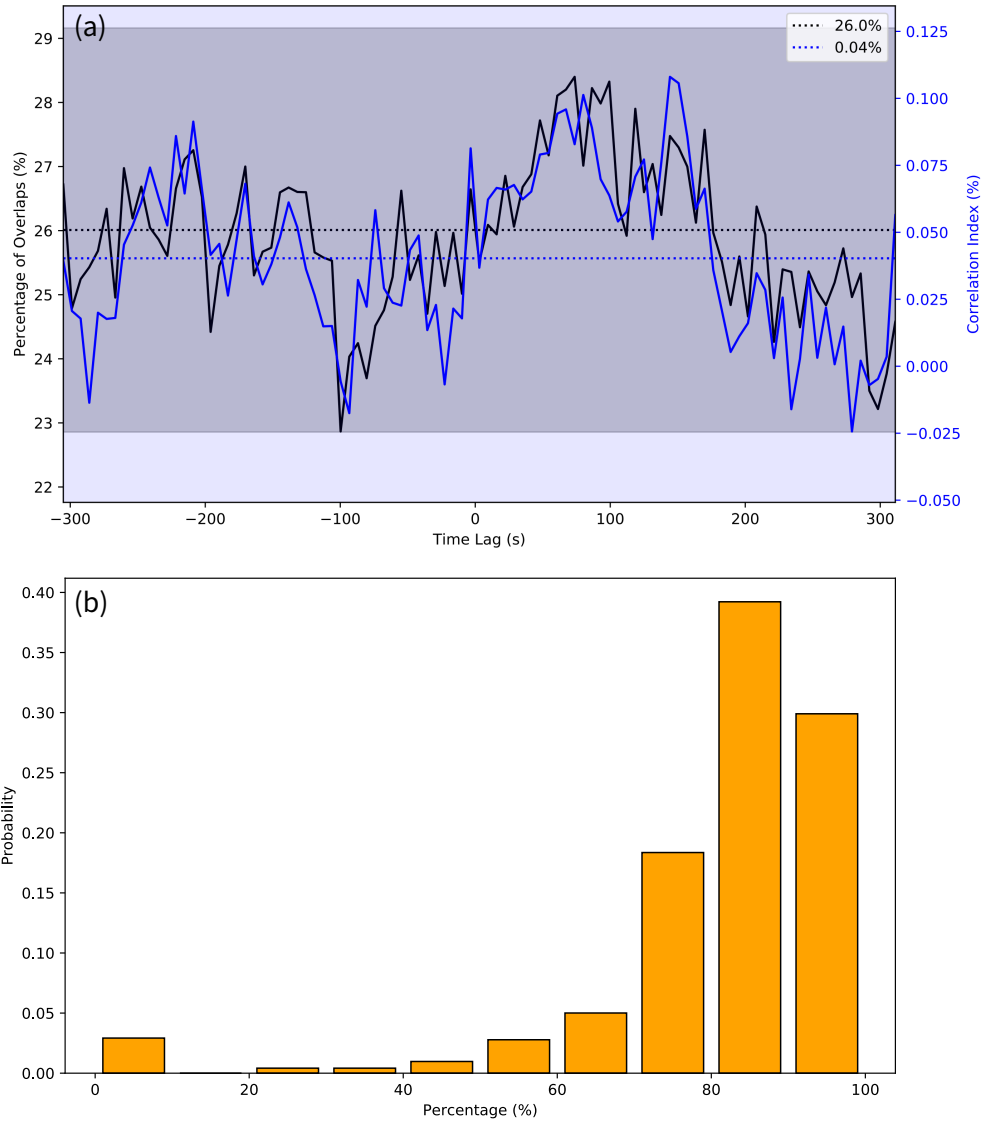

Supplementary Figure 4: **Correlation between SOT photospheric and chromospheric swirls.** Panel (a): Same as Fig. 3(b) but on a pre-shuffled dataset. We randomly shuffled the SOT Ca II H chromospheric observations once, before performing the calculation of the CI and overlap for varying time lags. No significant peaks could be found above the  $3\sigma$  levels. Panel (b): Histogram of percentage of swirls (in each SOT photospheric frame) which could be found to correspond to original (not pre-shuffled) SOT Ca II H chromospheric swirls within a time lag range of 100 s to 160 s. Source data are provided in the Source Data file.

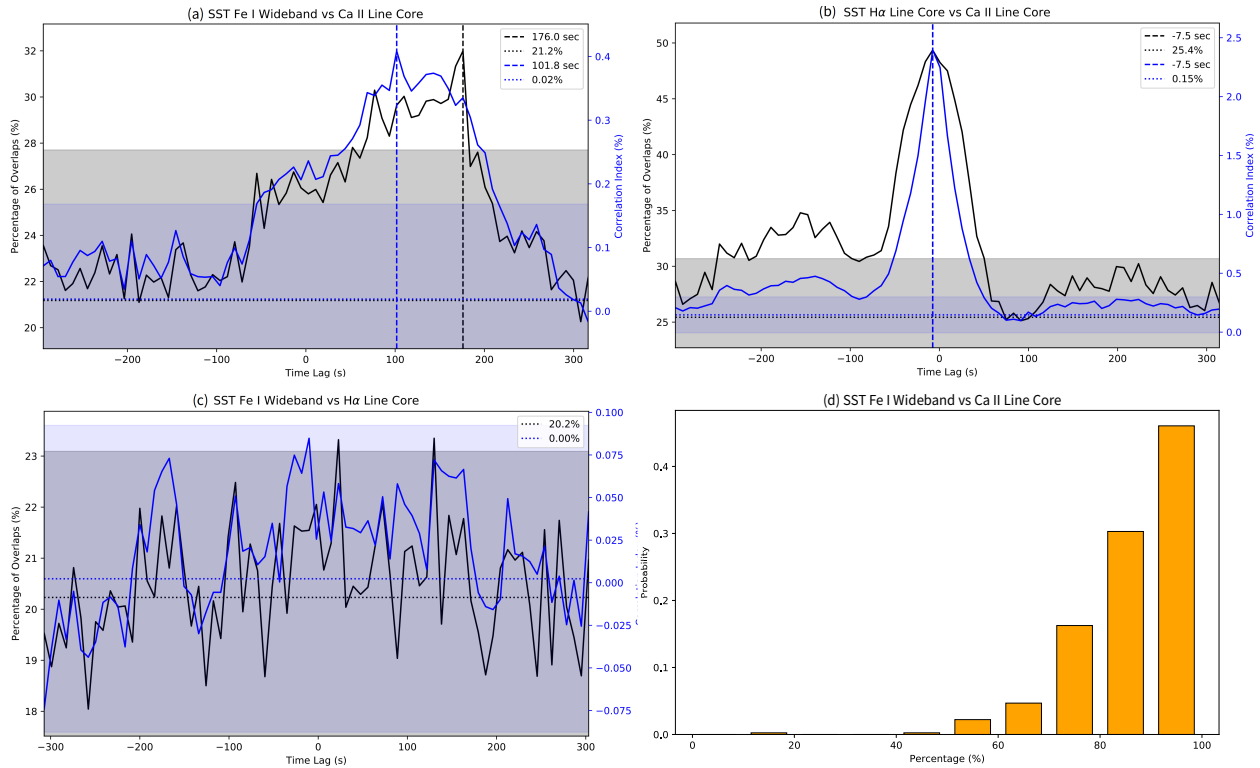

Supplementary Figure 5: **Correlations between swirls detected from different SST lines.** Panel (a): Fe I wideband photospheric observations vs. Ca II 8542 Å line core observations. Panel (b): H $\alpha$  6563 Å line core observations vs. Ca II 8542 Å line core observations. Panel (c): Fe I wideband photospheric observations vs. H $\alpha$  6563 Å line core observations. Meanings of colours and annotations are similar to those in Fig. 3(b) in the main article. Shadows in panels (a) and (b) are the 5 $\sigma$  ranges, while shadows in panel (c) are the 3 $\sigma$  ranges. Panel (d): Histogram of percentage of swirls (in each SST Fe I wideband photospheric frame) which could be found to correspond to SST Ca II line core chromospheric swirls within a time lag range of 100 s to 160 s. Source data are provided in the Source Data file.

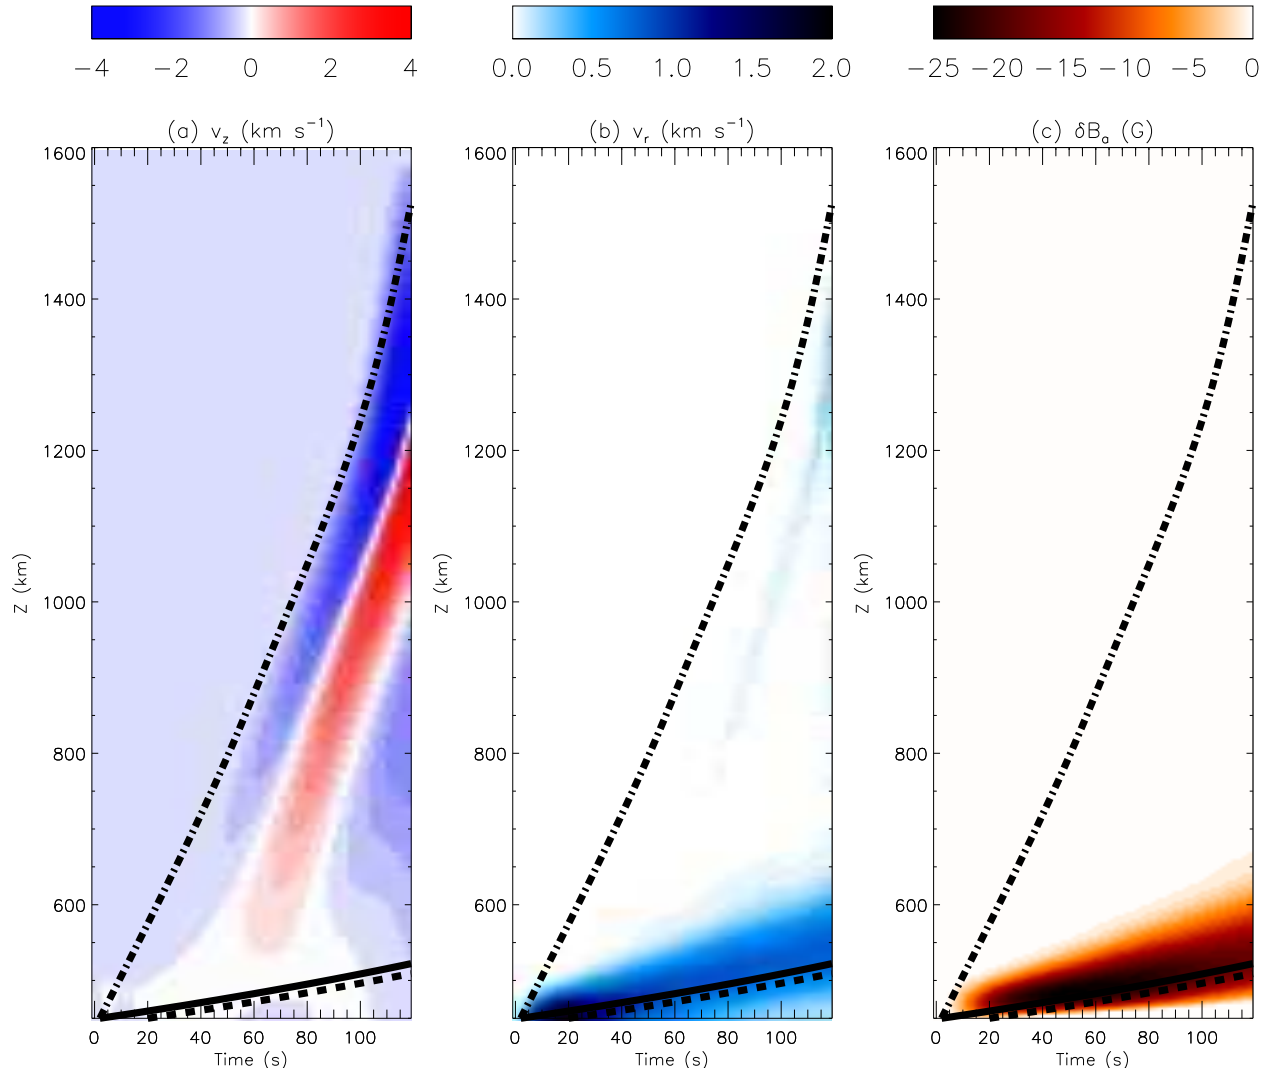

Supplementary Figure 6: **Time-distance plots of a slit located outside the flux tube.** The slit is located at a coordinate of around  $x = 395$  km,  $y = 395$  km along the  $z$  direction. See Fig. 4 for explanations of symbols, colors and curves. Source data are provided in the Source Data file.

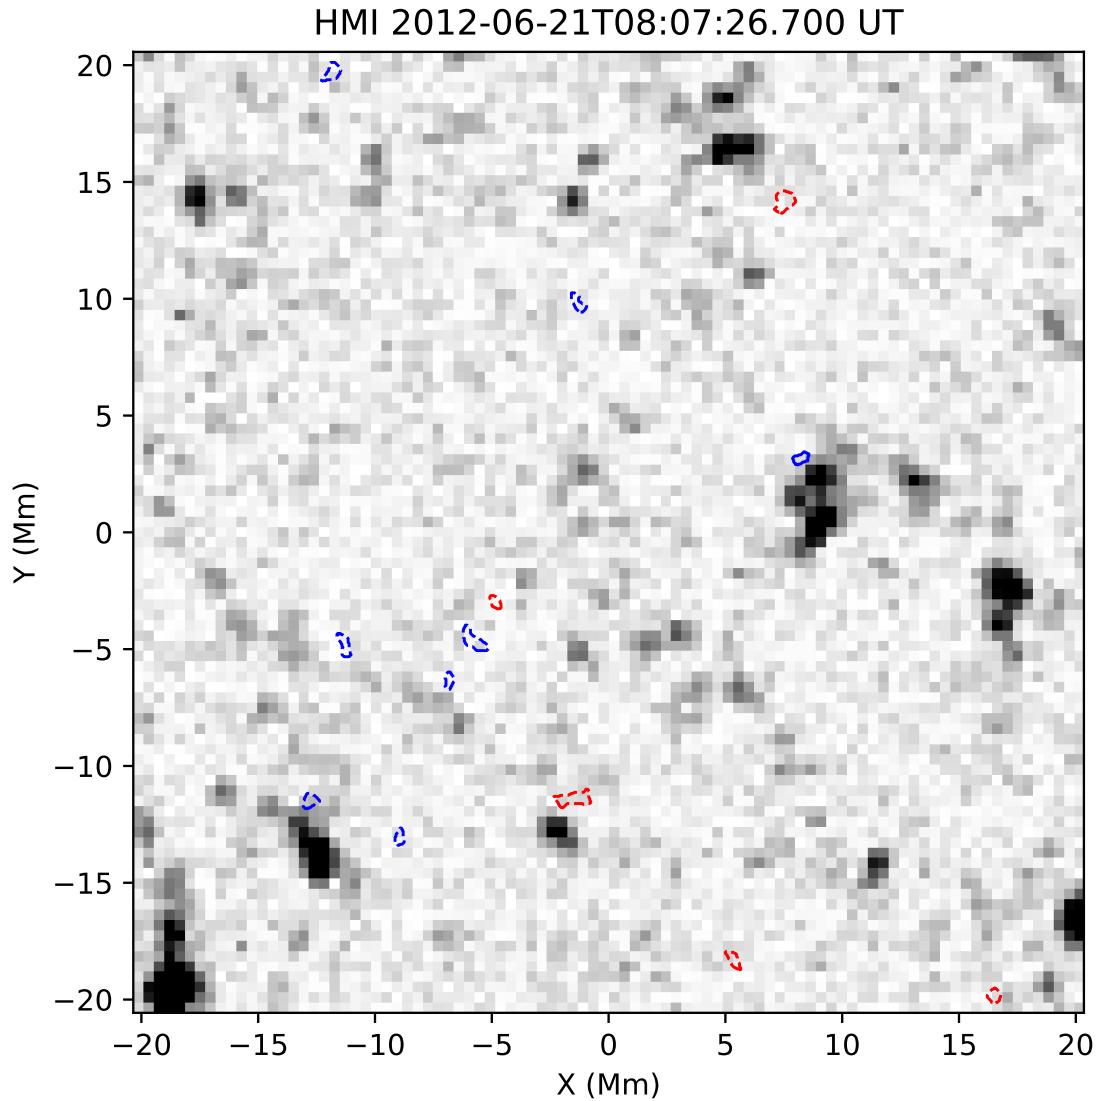

Supplementary Figure 7: **HMI LOS magnetogram and SST photospheric swirls.** Background: HMI LOS magnetogram at 08:07:26 UT in the FOV of the studied SST observations in the paper, with a scale of the absolute LOS magnetic field strength from 0 G (white) to 50 G (black). Red and blue contours: clockwise and counter-clockwise photospheric intensity swirls detected from SST Fe I 6302 Å wideband observations at almost the same time. Any swirl with even one point having absolute magnetic field strength above 30 G is contoured out with solid lines. All others are contoured out with dashed lines. Source data are provided in the Source Data file.

195 **Supplementary References**

- 197 1. van Noort, M., Rouppe van der Voort, L. & Löfdahl, M. G. Solar Image Restoration By Use  
198 Of Multi-frame Blind De-convolution With Multiple Objects And Phase Diversity. *Solar Phys.*  
199 **228**, 191–215 (2005).
- 200 2. de la Cruz Rodríguez, J., Löfdahl, M. G., Sütterlin, P., Hillberg, T. & Rouppe van der Voort, L.  
201 CRISPRED: A data pipeline for the CRISP imaging spectropolarimeter. *A&A* **573**, A40 (2015).
- 202 3. Henriques, V. M. J. Three-dimensional temperature mapping of solar photospheric fine structure  
203 using Ca II H filtergrams. *A&A* **548**, A114 (2012).
- 204 4. Shelyag, S., Fedun, V. & Erdélyi, R. Magnetohydrodynamic code for gravitationally-stratified  
205 media. *A&A* **486**, 655–662 (2008).
- 206 5. Fedun, V., Shelyag, S., Verth, G., Mathioudakis, M. & Erdélyi, R. MHD waves generated by  
207 high-frequency photospheric vortex motions. *Ann. Geophys.* **29**, 1029–1035 (2011).
- 208 6. Gent, F. A., Fedun, V., Mumford, S. J. & Erdélyi, R. Magnetohydrostatic equilibrium - I. Three-  
209 dimensional open magnetic flux tube in the stratified solar atmosphere. *MNRAS* **435**, 689–697  
210 (2013).
- 211 7. Mumford, S. J. & Erdélyi, R. Photospheric logarithmic velocity spirals as MHD wave genera-  
212 tion mechanisms. *MNRAS* **449**, 1679–1685 (2015).
- 213 8. Verma, M., Steffen, M. & Denker, C. Evaluating local correlation tracking using CO5BOLD  
214 simulations of solar granulation. *A&A* **555**, A136 (2013).
- 215 9. Withbroe, G. L. & Noyes, R. W. Mass and energy flow in the solar chromosphere and corona.  
216 *Ann. Rev. A&A* **15**, 363–387 (1977).
- 217 10. Liu, J., Nelson, C. J. & Erdélyi, R. Automated Swirl Detection Algorithm (ASDA) and Its  
218 Application to Simulation and Observational Data. *Astrophys. J.* **872**, 22–35 (2019).
- 219 11. Almeida, S. J. & Bonet, J. A. & Viticchi, B. & Del Moro, D. Magnetic Bright Points in the  
220 Quiet Sun. *Astrophys. J.* **715**, 26–29 (2010).
- 221 12. Scherrer, P. H., Schou, J., Bush, R. I., Kosovichev, A. G., Bogart, R. S., Hoeksema, J. T., Liu,  
222 Y., Jr. Duvall T. L., Zhao, J., Title, A. M., Schrijver, C. J., Tarbell, T. D. & Tomczyk, S. The  
223 Helioseismic and Magnetic Imager (HMI) Investigation for the Solar Dynamics Observatory  
224 (SDO). *Solar Phys.* **275**, 207–227 (2012).
- 225 13. Keys, P. H., Mathioudakis, M., Jess, D. B., Shelyag, S., Christian, D. J. & Keenan, F. P.  
226 Tracking magnetic bright point motions through the solar atmosphere. *MNRAS* **428**, 3220–  
227 3226 (2013).



- 228 14. Liu, Y., Hoeksema, J. T., Scherrer, P. H., Schou, J., Couvidat, S., Bush, R. I., Duvall, T. L.,  
229 Hayashi, K., Sun, X. & Zhao, X. Comparison of Line-of-Sight Magnetograms Taken by the  
230 Solar Dynamics Observatory/Helioseismic and Magnetic Imager and Solar and Heliospheric  
231 Observatory/Michelson Doppler Imager. *Solar Phys.* **279**, 295–316 (2012).
